# Supplementary material for: An investigation of new infrared nonlinear optical material: BaCdSnSe4, and three new related centrosymmetric compounds: Ba2SnSe4, Mg2GeSe4, and Ba2Ge2S6
Source: Royal Society of Chemistry journal article supplement (doi:10.1039/c5dt03215f), 2015-01-01

**Electronic Supplementary Information**

**An investigation on new infrared nonlinear optical material: BaCdSnSe<sub>4</sub>, and  
three new related centrosymmetric compounds: Ba<sub>2</sub>SnSe<sub>4</sub>, Mg<sub>2</sub>GeSe<sub>4</sub>, and  
Ba<sub>2</sub>Ge<sub>2</sub>S<sub>6</sub>**

***Kui Wu,<sup>a</sup> Xin Su,<sup>a,b</sup> Zhihua Yang,<sup>a</sup> Shilie Pan<sup>a,\*</sup>***

*<sup>a</sup>Key Laboratory of Functional Materials and Devices for Special Environments of  
CAS; Xinjiang Key Laboratory of Electronic Information Materials and Devices;  
Xinjiang Technical Institute of Physics & Chemistry of CAS, 40-1 South Beijing Road,  
Urumqi 830011, China*

*<sup>b</sup>University of Chinese Academy of Sciences, Beijing 100049, China*

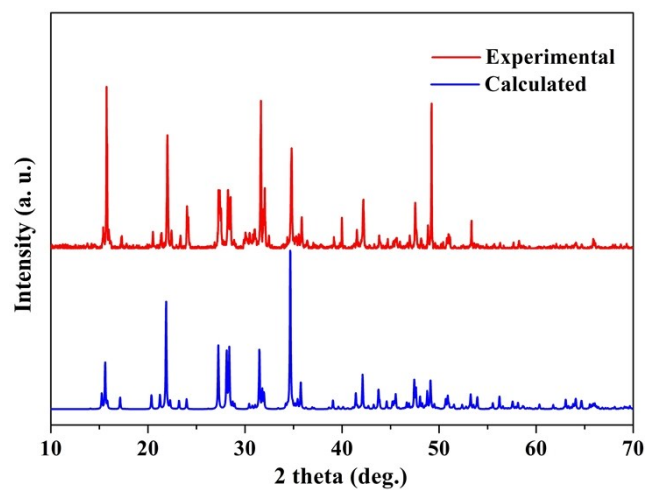

(a)

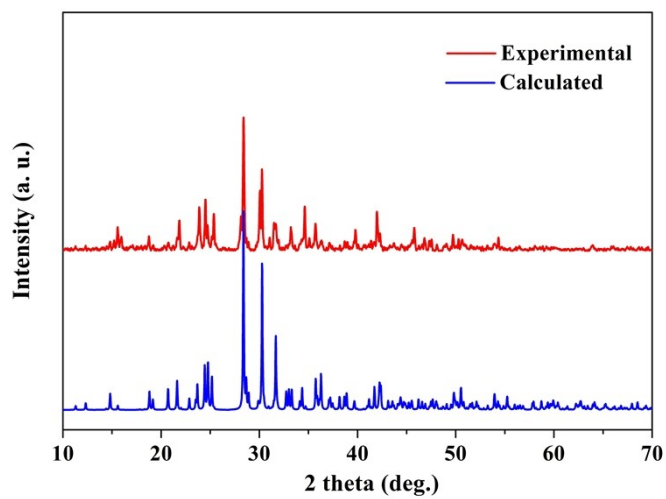

(b)

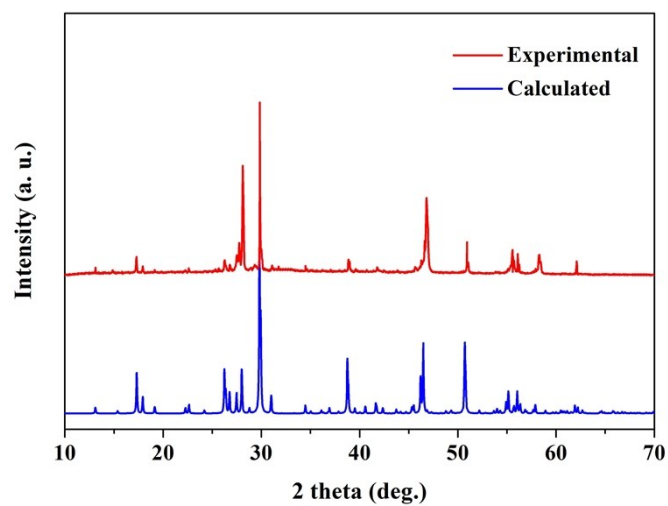

(c)

Figure S1. Powder XRD patterns of BaCdSnSe<sub>4</sub> (a), Ba<sub>2</sub>SnSe<sub>4</sub> (b), and Mg<sub>2</sub>GeSe<sub>4</sub> (c).

Table S1. (a) Atomic coordinates ( $\times 10^4$ ) and equivalent isotropic displacement parameters ( $\text{\AA}^2 \times 10^3$ ) for BaCdSnSe<sub>4</sub>.  $U_{\text{eq}}$  is defined as one-third of the trace of the orthogonalized  $U_{ij}$  tensor.

| Atom  | x       | y       | z       | $U_{\text{eq}}$ | BVS   |
|-------|---------|---------|---------|-----------------|-------|
| Ba(1) | 2500    | 2500    | 6255(3) | 17(1)           | 2.245 |
| Ba(2) | 2515(1) | 5022(1) | 6264(2) | 19(1)           | 2.249 |
| Ba(3) | 2500    | 7500    | 6294(3) | 17(1)           | 2.247 |
| Sn(1) | 1136(1) | 1245(1) | 6294(1) | 15(1)           | 4.026 |
| Cd(1) | 3876(1) | 1244(1) | 6302(2) | 24(1)           | 2.071 |
| Sn(2) | 1822(1) | 3754(1) | 3376(1) | 16(1)           | 4.033 |
| Se(1) | 2113(1) | 3770(2) | 5148(2) | 16(1)           | 2.115 |
| Cd(2) | 1758(1) | 6249(1) | 4125(2) | 25(1)           | 2.035 |
| Se(2) | 2182(1) | 6255(2) | 7465(2) | 17(1)           | 2.245 |
| Se(3) | 1213(2) | 5378(1) | 5149(3) | 18(1)           | 1.989 |
| Se(4) | 1201(2) | 2117(1) | 5140(3) | 18(1)           | 1.949 |
| Se(5) | 2828(1) | 6265(2) | 5056(2) | 19(1)           | 2.142 |
| Se(6) | 3720(2) | 5378(1) | 7618(3) | 19(1)           | 2.014 |
| Se(7) | 3702(2) | 2114(1) | 7613(3) | 18(1)           | 1.999 |
| Se(8) | 2094(1) | 1243(2) | 7308(2) | 16(1)           | 2.214 |

**Note:** To provide a check on the consistency of the structure determination, the method of Bond-Valence Parameters was used to calculate the bond valences of elements (Refs 1, 2). The following equation is commonly used to calculate the bond valence ( $v_{ij}$ ):

$$V_i = \sum_j v_{ij} = \sum_j \exp\left(\frac{r' - r_{ij}}{B}\right)$$

where  $r'$  is empirically determined bond valence parameter,  $r_{ij}$  is actual bond length, and  $B$  is commonly taken to be a universal constant equal to 0.37 Å. Bond valence  $v_{ij}$  is defined as sum of the bond valences between the atom  $i$  and  $j$ .

The calculated results have some deviations with oxidation states of elements, but they are still in the reasonable range. Therefore, we think that the calculated values are reasonable and can be acceptable.

Ref S1. I. D. Brown, and D. Altermatt, *Acta Crystallogr. Sect. B* 1985, **41**, 244.

Ref S2. N. E. Brese, and M. O'keeffe, *Acta Crystallogr. Sect. B* 1991, **47**, 192.

Table S1. (b) Atomic coordinates ( $\times 10^4$ ) and equivalent isotropic displacement parameters ( $\text{\AA}^2 \times 10^3$ ) for  $\text{Ba}_2\text{SnSe}_4$ .  $U_{\text{eq}}$  is defined as one-third of the trace of the orthogonalized  $U_{ij}$  tensor.

| Atom  | x        | y        | z       | $U_{\text{eq}}$ | BVS   |
|-------|----------|----------|---------|-----------------|-------|
| Ba(1) | 10945(1) | 8828(1)  | 8441(1) | 25(1)           | 1.924 |
| Ba(2) | 14663(1) | 8469(1)  | 6592(1) | 28(1)           | 1.995 |
| Sn(1) | 8065(1)  | 8139(1)  | 4933(1) | 22(1)           | 4.108 |
| Se(1) | 7629(1)  | 8830(1)  | 2880(1) | 25(1)           | 2.259 |
| Se(2) | 7623(1)  | 10213(1) | 6092(1) | 24(1)           | 2.109 |
| Se(3) | 10905(1) | 6896(1)  | 6066(1) | 23(1)           | 2.018 |
| Se(4) | 5776(1)  | 6291(1)  | 4567(1) | 32(1)           | 1.641 |

Table S1. (c) Atomic coordinates ( $\times 10^4$ ) and equivalent isotropic displacement parameters ( $\text{\AA}^2 \times 10^3$ ) for  $\text{Ba}_2\text{Ge}_2\text{S}_6$ .  $U_{\text{eq}}$  is defined as one-third of the trace of the orthogonalized  $U_{ij}$  tensor.

| Atom  | x        | y         | z       | $U_{\text{eq}}$ | BVS   |
|-------|----------|-----------|---------|-----------------|-------|
| Ba(1) | 1368(1)  | 2596(3)   | 6064(1) | 23(1)           | 1.875 |
| Ba(2) | 3629(1)  | -2460(3)  | 9695(1) | 23(1)           | 1.870 |
| Ge(1) | 4252(2)  | 1591(4)   | 7333(2) | 14(1)           | 4.000 |
| Ge(2) | 749(2)   | 6558(4)   | 3069(2) | 15(1)           | 3.964 |
| S(1)  | 3211(4)  | 2424(10)  | 5662(4) | 17(1)           | 1.975 |
| S(2)  | 1798(4)  | -2381(10) | 7441(4) | 19(1)           | 1.963 |
| S(3)  | 4238(4)  | -2344(10) | 7386(4) | 17(1)           | 2.069 |
| S(4)  | 756(4)   | 2563(10)  | 3143(4) | 17(1)           | 2.038 |
| S(5)  | -1010(4) | 2518(10)  | 5255(4) | 22(1)           | 1.831 |
| S(6)  | 3996(4)  | -7486(10) | 8754(4) | 22(1)           | 1.833 |

Table S1. (d) Atomic coordinates ( $\times 10^4$ ) and equivalent isotropic displacement parameters ( $\text{\AA}^2 \times 10^3$ ) for  $\text{Mg}_2\text{GeSe}_4$ .  $U_{\text{eq}}$  is defined as one-third of the trace of the orthogonalized  $U_{ij}$  tensor.

| Atom  | x        | y       | z       | $U_{\text{eq}}$ | BVS   |
|-------|----------|---------|---------|-----------------|-------|
| Se(1) | 929(1)   | 7500    | 7773(2) | 11(1)           | 2.016 |
| Se(2) | 1683(1)  | 5155(1) | 2458(1) | 12(1)           | 1.825 |
| Se(3) | -709(1)  | 7500    | 2525(2) | 12(1)           | 1.991 |
| Ge(1) | 886(1)   | 7500    | 4107(2) | 9(1)            | 3.853 |
| Mg(1) | -2305(3) | 7500    | 5052(6) | 14(1)           | 1.845 |
| Mg(2) | 0        | 5000    | 0       | 15(1)           | 1.957 |

Table S2. (a) Selected bond distances (Å) and angles (deg) for BaCdSnSe<sub>4</sub>.

|                         |            |                         |            |
|-------------------------|------------|-------------------------|------------|
| Ba(1)-Se(8)#1           | 3.320(5)   | Se(8)#1-Ba(1)-Se(8)     | 128.90(18) |
| Ba(1)-Se(8)             | 3.320(5)   | Se(8)#1-Ba(1)-Se(1)#1   | 149.17(5)  |
| Ba(1)-Se(1)#1           | 3.366(5)   | Se(8)-Ba(1)-Se(1)#1     | 61.75(7)   |
| Ba(1)-Se(1)             | 3.366(5)   | Se(8)#1-Ba(1)-Se(1)     | 61.75(7)   |
| Ba(1)-Se(7)             | 3.379(5)   | Se(8)-Ba(1)-Se(1)       | 149.17(5)  |
| Ba(1)-Se(7)#1           | 3.379(5)   | Se(1)#1-Ba(1)-Se(1)     | 126.93(17) |
| Ba(1)-Se(4)             | 3.392(4)   | Se(8)#1-Ba(1)-Se(7)     | 76.68(10)  |
| Ba(1)-Se(4)#1           | 3.392(4)   | Se(8)-Ba(1)-Se(7)       | 76.07(9)   |
| Ba(2)-Se(8)#1           | 3.322(4)   | Se(1)#1-Ba(1)-Se(7)     | 79.42(8)   |
| Ba(2)-Se(2)             | 3.326(5)   | Se(1)-Ba(1)-Se(7)       | 132.20(8)  |
| Ba(2)-Se(5)             | 3.339(5)   | Se(8)#1-Ba(1)-Se(7)#1   | 76.07(9)   |
| Ba(2)-Se(1)             | 3.347(5)   | Se(8)-Ba(1)-Se(7)#1     | 76.68(10)  |
| Ba(2)-Se(6)             | 3.362(5)   | Se(1)#1-Ba(1)-Se(7)#1   | 132.20(8)  |
| Ba(2)-Se(3)             | 3.383(5)   | Se(1)-Ba(1)-Se(7)#1     | 79.42(8)   |
| Ba(2)-Se(7)#2           | 3.397(5)   | Se(7)-Ba(1)-Se(7)#1     | 113.78(18) |
| Ba(2)-Se(4)#3           | 3.428(5)   | Se(8)#1-Ba(1)-Se(4)     | 130.35(8)  |
| Ba(3)-Se(2)#4           | 3.321(5)   | Se(8)-Ba(1)-Se(4)       | 74.78(8)   |
| Ba(3)-Se(2)             | 3.321(5)   | Se(1)#1-Ba(1)-Se(4)     | 78.58(10)  |
| Ba(3)-Se(5)             | 3.352(5)   | Se(1)-Ba(1)-Se(4)       | 78.42(10)  |
| Ba(3)-Se(5)#4           | 3.352(5)   | Se(7)-Ba(1)-Se(4)       | 149.32(6)  |
| Ba(3)-Se(3)#5           | 3.391(5)   | Se(7)#1-Ba(1)-Se(4)     | 68.13(12)  |
| Ba(3)-Se(3)#3           | 3.391(5)   | Se(8)#1-Ba(1)-Se(4)#1   | 74.78(8)   |
| Ba(3)-Se(6)#6           | 3.392(4)   | Se(8)-Ba(1)-Se(4)#1     | 130.35(8)  |
| Ba(3)-Se(6)#2           | 3.392(4)   | Se(1)#1-Ba(1)-Se(4)#1   | 78.42(10)  |
| Sn(1)-Se(5)#7           | 2.493(4)   | Se(1)-Ba(1)-Se(4)#1     | 78.58(10)  |
| Sn(1)-Se(7)#8           | 2.529(4)   | Se(7)-Ba(1)-Se(4)#1     | 68.13(12)  |
| Sn(1)-Se(4)             | 2.531(4)   | Se(7)#1-Ba(1)-Se(4)#1   | 149.32(6)  |
| Sn(1)-Se(8)             | 2.548(3)   | Se(4)-Ba(1)-Se(4)#1     | 127.0(2)   |
| Cd(1)-Se(2)#9           | 2.561(4)   | Se(8)#1-Ba(2)-Se(2)     | 125.27(13) |
| Cd(1)-Se(7)             | 2.688(5)   | Se(8)#1-Ba(2)-Se(5)     | 152.39(12) |
| Cd(1)-Se(4)#10          | 2.700(5)   | Se(2)-Ba(2)-Se(5)       | 64.95(8)   |
| Cd(1)-Se(1)#1           | 2.711(4)   | Se(8)#1-Ba(2)-Se(1)     | 61.92(8)   |
| Sn(2)-Se(1)             | 2.494(4)   | Se(2)-Ba(2)-Se(1)       | 151.34(11) |
| Sn(2)-Se(3)#11          | 2.524(4)   | Se(5)-Ba(2)-Se(1)       | 123.52(13) |
| Sn(2)-Se(6)#12          | 2.532(5)   | Se(8)#1-Ba(2)-Se(6)     | 76.31(10)  |
| Sn(2)-Se(2)#12          | 2.548(3)   | Se(2)-Ba(2)-Se(6)       | 73.04(9)   |
| Cd(2)-Se(8)#13          | 2.581(4)   | Se(5)-Ba(2)-Se(6)       | 84.14(9)   |
| Cd(2)-Se(6)#6           | 2.683(5)   | Se(1)-Ba(2)-Se(6)       | 131.94(10) |
| Cd(2)-Se(3)             | 2.708(5)   | Se(8)#1-Ba(2)-Se(3)     | 128.66(10) |
| Cd(2)-Se(5)             | 2.708(3)   | Se(2)-Ba(2)-Se(3)       | 79.95(8)   |
| Se(1)-Sn(2)-Se(2)#12    | 103.95(11) | Se(5)-Ba(2)-Se(3)       | 76.01(9)   |
| Se(3)#11-Sn(2)-Se(2)#12 | 102.61(15) | Se(1)-Sn(2)-Se(6)#12    | 120.42(16) |
| Se(6)#12-Sn(2)-Se(2)#12 | 103.18(14) | Se(3)#11-Sn(2)-Se(6)#12 | 103.12(13) |

|                        |            |                        |            |
|------------------------|------------|------------------------|------------|
| Se(1)-Ba(2)-Se(3)      | 76.60(10)  | Se(7)#2-Ba(2)-Se(4)#3  | 148.05(7)  |
| Se(6)-Ba(2)-Se(3)      | 151.43(7)  | Se(2)#4-Ba(3)-Se(2)    | 122.72(18) |
| Se(8)#1-Ba(2)-Se(7)#2  | 74.82(9)   | Se(2)#4-Ba(3)-Se(5)    | 154.95(5)  |
| Se(2)-Ba(2)-Se(7)#2    | 130.18(10) | Se(2)-Ba(3)-Se(5)      | 64.86(8)   |
| Se(5)-Ba(2)-Se(7)#2    | 80.08(10)  | Se(2)#4-Ba(3)-Se(5)#4  | 64.86(8)   |
| Se(1)-Ba(2)-Se(7)#2    | 77.70(9)   | Se(2)-Ba(3)-Se(5)#4    | 154.95(5)  |
| Se(6)-Ba(2)-Se(7)#2    | 68.94(14)  | Se(5)-Ba(3)-Se(5)#4    | 119.75(18) |
| Se(3)-Ba(2)-Se(7)#2    | 125.95(16) | Se(2)#4-Ba(3)-Se(3)#5  | 77.52(10)  |
| Se(8)#1-Ba(2)-Se(4)#3  | 75.15(9)   | Se(2)-Ba(3)-Se(3)#5    | 72.28(9)   |
| Se(2)-Ba(2)-Se(4)#3    | 77.29(10)  | Se(5)-Ba(3)-Se(3)#5    | 83.42(8)   |
| Se(5)-Ba(2)-Se(4)#3    | 131.39(10) | Se(5)#4-Ba(3)-Se(3)#5  | 131.27(8)  |
| Se(1)-Ba(2)-Se(4)#3    | 78.78(9)   | Se(2)#4-Ba(3)-Se(3)#3  | 72.28(9)   |
| Se(6)-Ba(2)-Se(4)#3    | 113.71(14) | Se(2)-Ba(3)-Se(3)#3    | 77.52(10)  |
| Se(3)-Ba(2)-Se(4)#3    | 67.94(14)  | Se(5)-Ba(3)-Se(3)#3    | 131.27(8)  |
| Se(5)#4-Ba(3)-Se(6)#2  | 74.73(10)  | Se(5)#4-Ba(3)-Se(3)#3  | 83.41(8)   |
| Se(3)#5-Ba(3)-Se(6)#2  | 69.10(12)  | Se(3)#5-Ba(3)-Se(3)#3  | 114.23(18) |
| Se(3)#3-Ba(3)-Se(6)#2  | 150.24(6)  | Se(2)#4-Ba(3)-Se(6)#6  | 128.48(8)  |
| Se(6)#6-Ba(3)-Se(6)#2  | 123.8(2)   | Se(2)-Ba(3)-Se(6)#6    | 80.17(8)   |
| Se(5)#7-Sn(1)-Se(7)#8  | 118.19(15) | Se(5)-Ba(3)-Se(6)#6    | 74.73(10)  |
| Se(5)#7-Sn(1)-Se(4)    | 118.29(16) | Se(5)#4-Ba(3)-Se(6)#6  | 77.92(10)  |
| Se(7)#8-Sn(1)-Se(4)    | 101.95(13) | Se(3)#5-Ba(3)-Se(6)#6  | 150.24(6)  |
| Se(5)#7-Sn(1)-Se(8)    | 103.81(12) | Se(3)#3-Ba(3)-Se(6)#6  | 69.10(12)  |
| Se(7)#8-Sn(1)-Se(8)    | 107.04(14) | Se(2)#4-Ba(3)-Se(6)#2  | 80.17(8)   |
| Se(4)-Sn(1)-Se(8)      | 106.73(14) | Se(2)-Ba(3)-Se(6)#2    | 128.48(8)  |
| Se(2)#9-Cd(1)-Se(7)    | 124.84(17) | Se(5)-Ba(3)-Se(6)#2    | 77.92(10)  |
| Se(2)#9-Cd(1)-Se(4)#10 | 125.48(16) | Se(8)#13-Cd(2)-Se(6)#6 | 128.01(17) |
| Se(7)-Cd(1)-Se(4)#10   | 93.73(12)  | Se(8)#13-Cd(2)-Se(3)   | 128.22(17) |
| Se(2)#9-Cd(1)-Se(1)#1  | 99.50(12)  | Se(6)#6-Cd(2)-Se(3)    | 94.53(12)  |
| Se(7)-Cd(1)-Se(1)#1    | 105.92(14) | Se(8)#13-Cd(2)-Se(5)   | 100.89(11) |
| Se(4)#10-Cd(1)-Se(1)#1 | 105.24(14) | Se(6)#6-Cd(2)-Se(5)    | 98.77(14)  |
| Se(1)-Sn(2)-Se(3)#11   | 120.83(16) | Se(3)-Cd(2)-Se(5)      | 99.67(14)  |

Note. Symmetry transformations used to generate equivalent atoms:

|                            |                            |
|----------------------------|----------------------------|
| #1 $-x+1/2, -y+1/2, z$     | #2 $-x+3/4, y+1/4, z-1/4$  |
| #3 $-x+1/4, y+1/4, z+1/4$  | #4 $-x+1/2, -y+3/2, z$     |
| #5 $x+1/4, -y+5/4, z+1/4$  | #6 $x-1/4, -y+5/4, z-1/4$  |
| #7 $x-1/4, -y+3/4, z+1/4$  | #8 $x-1/4, -y+1/4, z-1/4$  |
| #9 $x+1/4, -y+3/4, z-1/4$  | #10 $x+1/4, -y+1/4, z+1/4$ |
| #11 $-x+1/4, y-1/4, z-1/4$ | #12 $-x+1/2, -y+1, z-1/2$  |
| #13 $x, y+1/2, z-1/2$      | #14 $-x+1/2, -y+1, z+1/2$  |
| #15 $-x+3/4, y-1/4, z+1/4$ | #16 $x, y-1/2, z+1/2$      |



Table S2. (b) Selected bond distances (Å) and angles (deg) for Ba<sub>2</sub>SnSe<sub>4</sub>.

|                       |            |                       |           |
|-----------------------|------------|-----------------------|-----------|
| Ba(1)-Se(1)#1         | 3.2501(12) | Se(2)-Ba(1)-Se(4)#5   | 137.23(3) |
| Ba(1)-Se(3)#2         | 3.3528(13) | Se(3)#3-Ba(1)-Se(4)#5 | 118.29(3) |
| Ba(1)-Se(2)           | 3.3878(13) | Se(3)-Ba(1)-Se(4)#5   | 85.76(3)  |
| Ba(1)-Se(3)#3         | 3.4293(12) | Se(2)#4-Ba(1)-Se(4)#5 | 70.00(3)  |
| Ba(1)-Se(3)           | 3.4454(12) | Se(1)#2-Ba(1)-Se(4)#5 | 135.02(3) |
| Ba(1)-Se(2)#4         | 3.5292(12) | Se(4)#3-Ba(1)-Se(4)#5 | 49.60(3)  |
| Ba(1)-Se(1)#2         | 3.6054(13) | Se(1)#5-Ba(2)-Se(2)#6 | 84.47(3)  |
| Ba(1)-Se(4)#3         | 3.6786(14) | Se(1)#5-Ba(2)-Se(2)#1 | 139.95(3) |
| Ba(1)-Se(4)#5         | 3.7929(15) | Se(2)#6-Ba(2)-Se(2)#1 | 79.16(3)  |
| Ba(2)-Se(1)#5         | 3.1975(12) | Se(1)#5-Ba(2)-Se(3)   | 108.23(3) |
| Ba(2)-Se(2)#6         | 3.2784(13) | Se(2)#6-Ba(2)-Se(3)   | 159.43(3) |
| Ba(2)-Se(2)#1         | 3.3353(13) | Se(2)#1-Ba(2)-Se(3)   | 80.84(3)  |
| Ba(2)-Se(3)           | 3.3490(13) | Se(1)#5-Ba(2)-Se(1)#1 | 142.62(2) |
| Ba(2)-Se(1)#1         | 3.4088(13) | Se(2)#6-Ba(2)-Se(1)#1 | 103.27(3) |
| Ba(2)-Se(4)#5         | 3.4348(14) | Se(2)#1-Ba(2)-Se(1)#1 | 77.11(3)  |
| Ba(2)-Se(4)#6         | 3.6492(14) | Se(3)-Ba(2)-Se(1)#1   | 76.74(3)  |
| Sn(1)-Se(4)           | 2.5010(13) | Se(1)#5-Ba(2)-Se(4)#5 | 71.96(3)  |
| Sn(1)-Se(1)           | 2.5108(13) | Se(2)#6-Ba(2)-Se(4)#5 | 106.26(3) |
| Sn(1)-Se(2)           | 2.5226(12) | Se(2)#1-Ba(2)-Se(4)#5 | 147.83(3) |
| Sn(1)-Se(3)           | 2.5351(13) | Se(3)-Ba(2)-Se(4)#5   | 93.27(3)  |
| Se(1)#1-Ba(1)-Se(3)#2 | 141.66(3)  | Se(1)#1-Ba(2)-Se(4)#5 | 70.77(3)  |
| Se(1)#1-Ba(1)-Se(2)   | 70.62(3)   | Se(1)#5-Ba(2)-Se(4)#6 | 66.35(3)  |
| Se(3)#2-Ba(1)-Se(2)   | 125.17(3)  | Se(2)#6-Ba(2)-Se(4)#6 | 72.37(3)  |
| Se(1)#1-Ba(1)-Se(3)#3 | 80.59(3)   | Se(2)#1-Ba(2)-Se(4)#6 | 73.89(3)  |
| Se(3)#2-Ba(1)-Se(3)#3 | 78.44(3)   | Se(3)-Ba(2)-Se(4)#6   | 97.45(3)  |
| Se(2)-Ba(1)-Se(3)#3   | 63.53(3)   | Se(1)#1-Ba(2)-Se(4)#6 | 150.98(3) |
| Se(1)#1-Ba(1)-Se(3)   | 77.54(3)   | Se(4)#5-Ba(2)-Se(4)#6 | 138.25(3) |
| Se(3)#2-Ba(1)-Se(3)   | 137.20(2)  | Se(4)-Sn(1)-Se(1)     | 102.23(4) |
| Se(2)-Ba(1)-Se(3)     | 75.31(3)   | Se(4)-Sn(1)-Se(2)     | 109.43(5) |
| Se(3)#3-Ba(1)-Se(3)   | 137.85(2)  | Se(1)-Sn(1)-Se(2)     | 113.27(4) |
| Se(1)#1-Ba(1)-Se(2)#4 | 122.54(3)  | Se(4)-Sn(1)-Se(3)     | 107.11(4) |
| Se(3)#2-Ba(1)-Se(2)#4 | 78.02(3)   | Se(1)-Sn(1)-Se(3)     | 112.93(4) |
| Se(2)-Ba(1)-Se(2)#4   | 127.83(3)  | Se(2)-Ba(1)-Se(4)#3   | 119.13(3) |
| Se(3)#3-Ba(1)-Se(2)#4 | 155.63(3)  | Se(3)#3-Ba(1)-Se(4)#3 | 69.39(3)  |
| Se(3)-Ba(1)-Se(2)#4   | 61.93(3)   | Se(3)-Ba(1)-Se(4)#3   | 129.48(3) |
| Se(1)#1-Ba(1)-Se(1)#2 | 142.02(2)  | Se(2)#4-Ba(1)-Se(4)#3 | 111.02(3) |
| Se(3)#2-Ba(1)-Se(1)#2 | 74.28(3)   | Se(1)#2-Ba(1)-Se(4)#3 | 151.35(3) |
| Se(2)-Ba(1)-Se(1)#2   | 76.93(3)   | Se(1)#1-Ba(1)-Se(4)#5 | 67.97(3)  |
| Se(3)#3-Ba(1)-Se(1)#2 | 102.31(3)  | Se(3)#2-Ba(1)-Se(4)#5 | 94.67(3)  |
| Se(3)-Ba(1)-Se(1)#2   | 75.57(3)   | Se(1)#1-Ba(1)-Se(4)#3 | 65.50(3)  |
| Se(2)#4-Ba(1)-Se(1)#2 | 65.08(3)   | Se(3)#2-Ba(1)-Se(4)#3 | 77.16(3)  |

Note. Symmetry transformations used to generate equivalent atoms:

#1  $-x+2, -y+2, -z+1$       #2  $x, -y+3/2, z+1/2$   
#3  $-x+2, y+1/2, -z+3/2$       #4  $-x+2, y-1/2, -z+3/2$   
#5  $x+1, -y+3/2, z+1/2$       #6  $x+1, y, z$       #7  $x, -y+3/2, z-1/2$   
#8  $x-1, -y+3/2, z-1/2$       #9  $x-1, y, z$

Table S2. (c) Selected bond distances (Å) and angles (deg) for Ba<sub>2</sub>Ge<sub>2</sub>S<sub>6</sub>.

|                     |            |                     |            |
|---------------------|------------|---------------------|------------|
| Ba(1)-S(1)          | 3.106(6)   | S(1)-Ba(1)-S(5)#1   | 83.36(15)  |
| Ba(1)-S(5)#1        | 3.243(6)   | S(1)-Ba(1)-S(4)#2   | 139.41(13) |
| Ba(1)-S(4)#2        | 3.311(5)   | S(5)#1-Ba(1)-S(4)#2 | 116.19(15) |
| Ba(1)-S(2)          | 3.319(6)   | S(1)-Ba(1)-S(2)     | 95.33(14)  |
| Ba(1)-S(5)          | 3.332(6)   | S(5)#1-Ba(1)-S(2)   | 178.45(15) |
| Ba(1)-S(2)#3        | 3.342(6)   | S(4)#2-Ba(1)-S(2)   | 64.36(14)  |
| Ba(1)-S(5)#4        | 3.357(6)   | S(1)-Ba(1)-S(5)     | 153.83(12) |
| Ba(1)-S(4)          | 3.612(5)   | S(5)#1-Ba(1)-S(5)   | 86.09(15)  |
| Ba(2)-S(2)          | 3.113(5)   | S(4)#2-Ba(1)-S(5)   | 66.49(12)  |
| Ba(2)-S(6)#3        | 3.278(6)   | S(2)-Ba(1)-S(5)     | 95.44(14)  |
| Ba(2)-S(6)          | 3.304(6)   | S(1)-Ba(1)-S(2)#3   | 98.46(15)  |
| Ba(2)-S(3)#5        | 3.316(5)   | S(5)#1-Ba(1)-S(2)#3 | 59.74(12)  |
| Ba(2)-S(1)#5        | 3.317(6)   | S(4)#2-Ba(1)-S(2)#3 | 67.55(14)  |
| Ba(2)-S(6)#6        | 3.328(6)   | S(2)-Ba(1)-S(2)#3   | 119.76(14) |
| Ba(2)-S(1)#2        | 3.352(6)   | S(5)-Ba(1)-S(2)#3   | 96.75(14)  |
| Ba(2)-S(3)          | 3.606(5)   | S(1)-Ba(1)-S(5)#4   | 80.43(15)  |
| Ge(1)-S(1)          | 2.169(5)   | S(5)#1-Ba(1)-S(5)#4 | 121.59(14) |
| Ge(1)-S(6)#3        | 2.173(5)   | S(4)#2-Ba(1)-S(5)#4 | 112.25(14) |
| Ge(1)-S(3)#7        | 2.270(6)   | S(2)-Ba(1)-S(5)#4   | 58.86(12)  |
| Ge(1)-S(3)          | 2.268(6)   | S(5)-Ba(1)-S(5)#4   | 84.90(16)  |
| Ge(2)-S(2)#8        | 2.172(6)   | S(2)#3-Ba(1)-S(5)#4 | 178.02(14) |
| Ge(2)-S(5)#1        | 2.172(5)   | S(1)-Ba(1)-S(4)     | 68.87(13)  |
| Ge(2)-S(4)#9        | 2.251(6)   | S(5)#1-Ba(1)-S(4)   | 60.63(13)  |
| Ge(2)-S(4)          | 2.303(6)   | S(4)#2-Ba(1)-S(4)   | 151.53(18) |
| S(2)-Ba(1)-S(4)     | 119.67(13) | S(1)#5-Ba(2)-S(6)#6 | 95.37(14)  |
| S(5)-Ba(1)-S(4)     | 85.08(12)  | S(2)-Ba(2)-S(1)#2   | 96.86(14)  |
| S(2)#3-Ba(1)-S(4)   | 120.03(14) | S(6)#3-Ba(2)-S(1)#2 | 59.12(13)  |
| S(5)#4-Ba(1)-S(4)   | 61.14(13)  | S(6)-Ba(2)-S(1)#2   | 178.52(15) |
| S(2)-Ba(2)-S(6)#3   | 81.18(15)  | S(3)#5-Ba(2)-S(1)#2 | 67.60(13)  |
| S(2)-Ba(2)-S(6)     | 82.72(15)  | S(1)#5-Ba(2)-S(1)#2 | 119.50(15) |
| S(6)#3-Ba(2)-S(6)   | 122.15(15) | S(6)#6-Ba(2)-S(1)#2 | 96.25(14)  |
| S(2)-Ba(2)-S(3)#5   | 140.18(14) | S(2)-Ba(2)-S(3)     | 68.08(13)  |
| S(6)#3-Ba(2)-S(3)#5 | 115.80(14) | S(6)#3-Ba(2)-S(3)   | 60.02(13)  |
| S(6)-Ba(2)-S(3)#5   | 111.86(14) | S(6)-Ba(2)-S(3)     | 62.38(13)  |
| S(2)-Ba(2)-S(1)#5   | 98.39(14)  | S(3)#5-Ba(2)-S(3)   | 151.72(18) |
| S(6)#3-Ba(2)-S(1)#5 | 178.43(15) | S(1)#5-Ba(2)-S(3)   | 121.25(13) |
| S(6)-Ba(2)-S(1)#5   | 59.22(13)  | S(6)#6-Ba(2)-S(3)   | 85.07(12)  |
| S(3)#5-Ba(2)-S(1)#5 | 63.62(13)  | S(1)#2-Ba(2)-S(3)   | 118.79(13) |
| S(2)-Ba(2)-S(6)#6   | 153.15(13) | S(1)-Ge(1)-S(6)#3   | 121.3(2)   |
| S(6)#3-Ba(2)-S(6)#6 | 85.63(15)  | S(1)-Ge(1)-S(3)#7   | 110.8(2)   |
| S(6)-Ba(2)-S(6)#6   | 84.71(15)  | S(6)#3-Ge(1)-S(3)#7 | 110.5(2)   |
| S(3)#5-Ba(2)-S(6)#6 | 66.66(13)  | S(1)-Ge(1)-S(3)     | 103.9(2)   |
| S(2)#8-Ge(2)-S(4)   | 104.2(2)   | S(6)#3-Ge(1)-S(3)   | 102.1(2)   |

|                     |          |                     |          |
|---------------------|----------|---------------------|----------|
| S(5)#1-Ge(2)-S(4)   | 101.8(2) | S(3)#7-Ge(1)-S(3)   | 106.7(2) |
| S(4)#9-Ge(2)-S(4)   | 105.8(2) | S(2)#8-Ge(2)-S(5)#1 | 120.9(2) |
| S(5)#1-Ge(2)-S(4)#9 | 110.8(2) | S(2)#8-Ge(2)-S(4)#9 | 111.5(2) |

Note. Symmetry transformations used to generate equivalent atoms:

- #1  $-x, -y+1, -z+1$       #2  $x, -y+1/2, z+1/2$   
#3  $x, y+1, z$       #4  $-x, -y, -z+1$       #5  $x, -y-1/2, z+1/2$   
#6  $-x+1, -y-1, -z+2$       #7  $-x+1, y+1/2, -z+3/2$   
#8  $x, -y+1/2, z-1/2$       #9  $-x, y+1/2, -z+1/2$   
#10  $x, -y-1/2, z-1/2$       #11  $x, y-1, z$       #12  $-x+1, y-1/2, -z+3/2$   
#13  $-x, y-1/2, -z+1/2$



Figure S2. IR spectra of title compounds: 1–BaCdSnSe<sub>4</sub>; 2–Ba<sub>2</sub>SnSe<sub>4</sub>; 3–Mg<sub>2</sub>GeSe<sub>4</sub>; 4–Ba<sub>2</sub>Ge<sub>2</sub>S<sub>6</sub>.

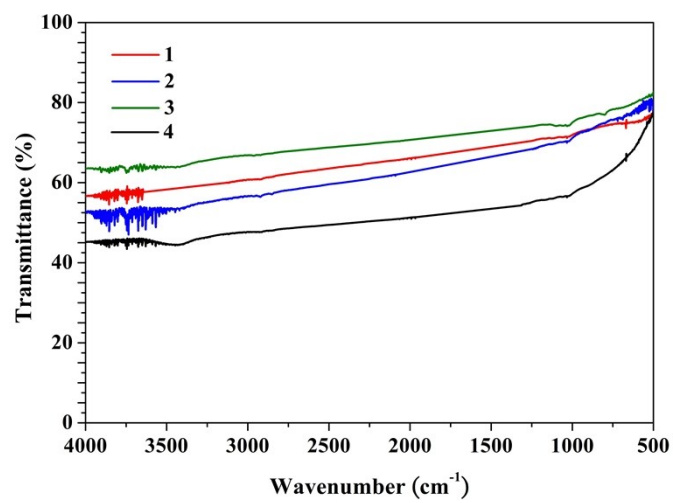

Figure S3. Particle size versus SHG intensity for compound 1.

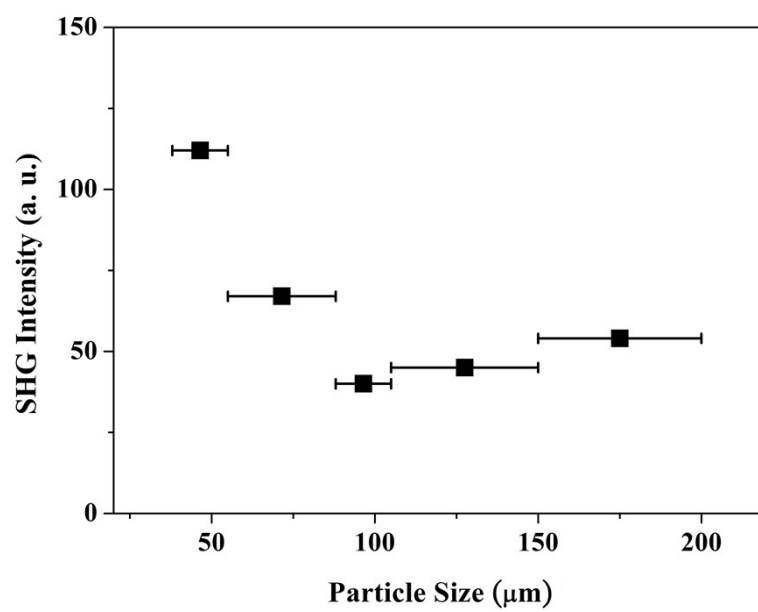

Figure S4. Band structures of (a)  $\text{Ba}_2\text{SnSe}_4$ , (b)  $\text{Mg}_2\text{GeSe}_4$  and (c)  $\text{Ba}_2\text{Ge}_2\text{S}_6$ .

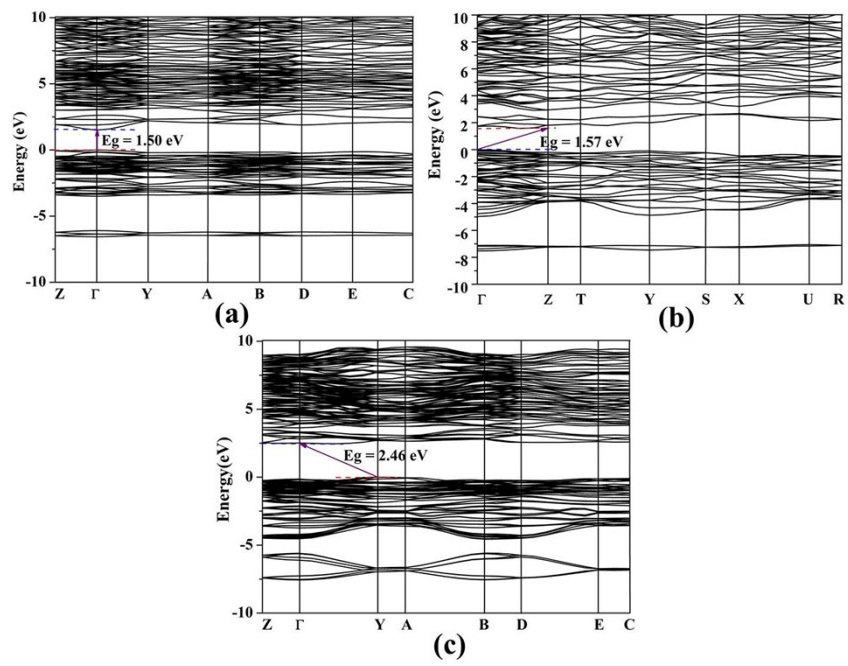



Figure S5. Total and partial densities of states (PDOS and TDOS) plots of (a)  $\text{Ba}_2\text{SnSe}_4$ , (b)  $\text{Ba}_2\text{Ge}_2\text{S}_6$  and (c)  $\text{Mg}_2\text{GeSe}_4$ .

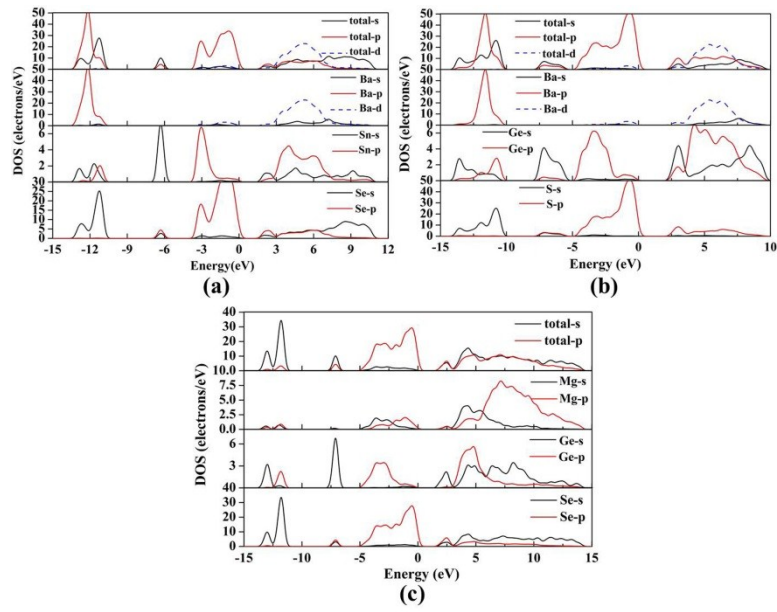

Figure S6. Calculated birefringences of title compounds: 1–BaCdSnSe<sub>4</sub>; 2–Ba<sub>2</sub>SnSe<sub>4</sub>; 3– Mg<sub>2</sub>GeSe<sub>4</sub>; 4– Ba<sub>2</sub>Ge<sub>2</sub>S<sub>6</sub>.

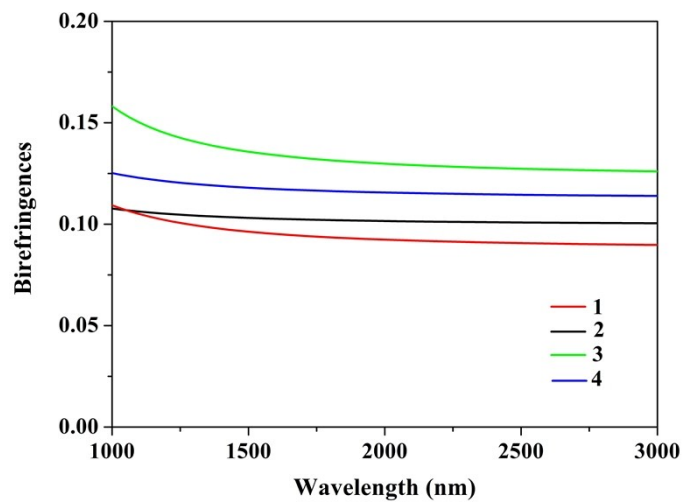

Supplement: c5dt03215f1.pdf [file c5dt03215f1.pdf]
